# Supplementary material
Source: publisher site journal article supplement (https://www.dovepress.com/article/228347)

APPENDIX

To manually change the magnification (also referred to as “pixel size”) it is important to first verify IMAGEnet is closed.

After this has been verified, one has to create an additional entry into the Windows Registry (which can be started from the command prompt by typing “regedit”):

**HKEY_CURRENT_USER/SOFTWARE/TOPCON/IMAGEnet ibase/System**

**ChangePixelSize**  REG_BINARY  **01**

Here-after open IMAGEnet software, and enable the option to edit the properties of the loaded images (see print-screen 1). Then close the program.

When an image is subsequently loaded in the IMAGEnet software, the pixel size can be altered as is shown in print-screen 2.

Caution should be taken when manually changing pixel size; It is recommended to back-up your database before adjusting the magnification, since altered images are saved within the same database and erroneous modifications of registry entries might corrupt the database. We strongly advise to consult TopCon prior to changing magnification values, especially since this procedure might change depending on software version (the described method has been tested in version 3.10.5).

Print-screen 1
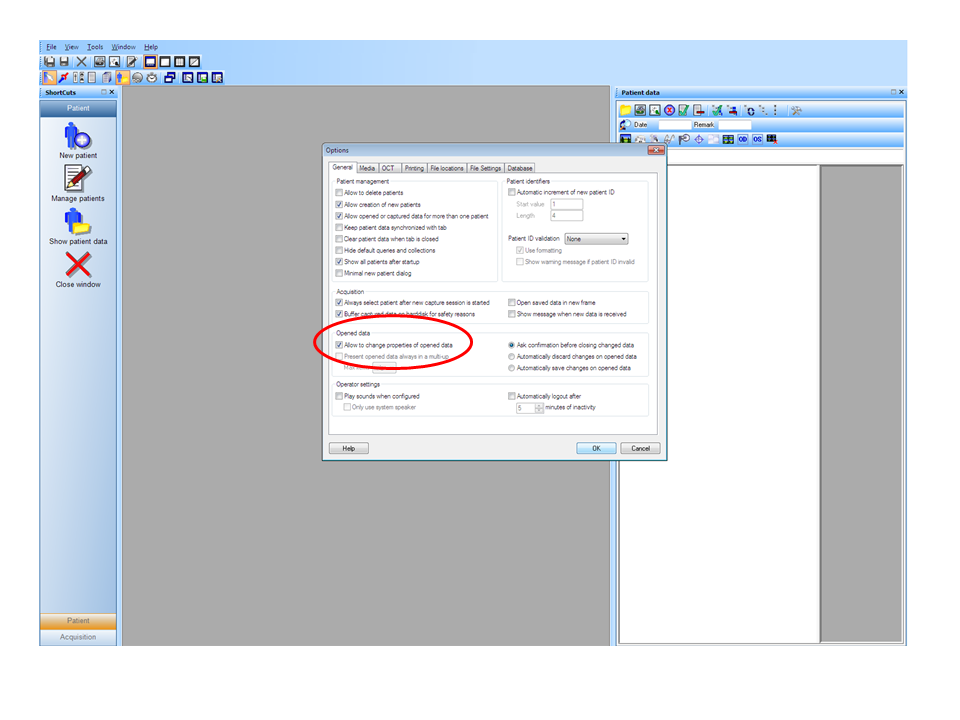


Print-screen 2
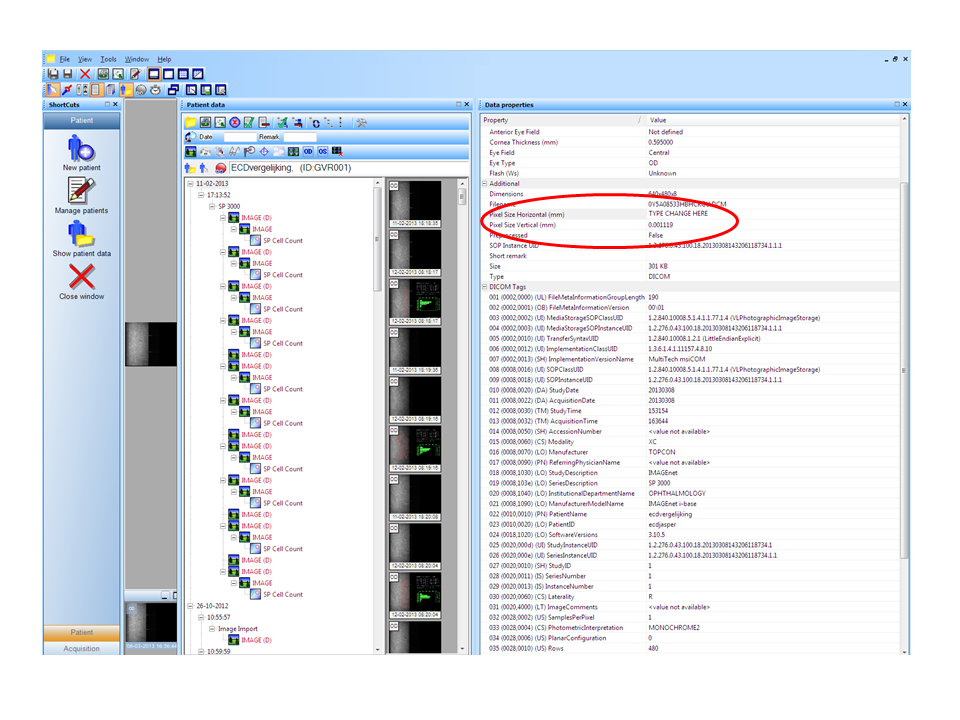

Supplement: Supplementary file 1 [file get_supplementary_file.php]
